# Supplementary material for: Identification and Evolution of a Natural Tetr Protein Based on Molecular Docking and Development of a Fluorescence Polari-Zation Assay for Multi-Detection of 10 Tetracyclines in Milk
Source: MDPI journal article supplement (doi:10.3390/foods11233850), 2022-11-28

Supplementary Materials for

**Identification and evolution of a natural TetR protein based on molecular docking and development of a fluorescence polarization assay for multi-detection of 10 tetracyclines in milk**

Wan Qiu Xia, Jing Liu, Jian Ping Wang

College of Veterinary Medicine, Hebei Agricultural University, Baoding Hebei

071000, China

**Table S1.** The nine unique peptide fragments of the natural TetR protein.

| No. | Amino Acid Sequence | Length | Mass     | N-Term Cleavage Window | C-Term Cleavage Window |
|-----|---------------------|--------|----------|------------------------|------------------------|
| 1   | ALLDALAIEMLDR       | 13     | 1442.78  | YWHVKNKRALLDALAI       | LAIEMLDRHHTHFCPL       |
| 2   | CALLSHR             | 7      | 855.4385 | RNNAKSFRCALLSHRD       | RCALLSHRDGAKVHLG       |
| 3   | CALLSHRDGAK         | 11     | 1226.619 | RNNAKSFRCALLSHRD       | LSHRDGAKVHLGTRPT       |
| 4   | EERETPTTDSMPPLLR    | 16     | 1870.91  | DQEHQVAKEERETPTT       | DSMPPLLRQAIELFDH       |
| 5   | ETPTTDSMPPLLR       | 13     | 1456.723 | HQVAKEERETPTTDSM       | DSMPPLLRQAIELFDH       |
| 6   | LGVEQPTLYWHVK       | 13     | 1568.835 | TTRKLAQKLGVEQPTL       | PTLYWHVKNKRALLDA       |
| 7   | LGVEQPTLYWHVKNKR    | 16     | 1967.074 | TTRKLAQKLGVEQPTL       | YWHVKNKRALLDALAI       |
| 8   | SFRCALLSHR          | 10     | 1245.64  | DFLRNNAKSFRCALLS       | RCALLSHRDGAKVHLG       |
| 9   | SFRCALLSHRDGAK      | 14     | 1616.821 | DFLRNNAKSFRCALLS       | LSHRDGAKVHLGTRPT       |

**Table S2.** Affinity parameters of the natural TetR and the mutant for the 10 TCs.

| No. | Receptor                     | Ligand            | Ka<br>(1/Ms) | Kd (1/s) | KD (M)   | KA<br>(Log2(KD)) |
|-----|------------------------------|-------------------|--------------|----------|----------|------------------|
| 1   | TetR                         | Tetracycline      | 2.03E+02     | 1.56E-03 | 7.69E-06 | 16.988           |
| 2   | TetR                         | Chlortetracycline | 2.97E+03     | 1.48E-02 | 4.99E-06 | 17.612           |
| 3   | TetR                         | Minocycline       | 4.54E+03     | 5.07E-04 | 1.12E-07 | 23.093           |
| 4   | TetR                         | Tigecycline       | 1.01E+03     | 1.04E-05 | 1.04E-08 | 26.525           |
| 5   | TetR                         | Doxycycline       | 5.34E+04     | 1.13E-03 | 2.11E-08 | 25.496           |
| 6   | TetR                         | Demecycline       | 2.77E+03     | 2.06E-04 | 7.44E-08 | 23.680           |
| 7   | TetR                         | Metacycline       | 1.44E+03     | 1.60E-04 | 1.11E-07 | 23.101           |
| 8   | TetR                         | Lymecycline       | 3.17E+03     | 1.16E-03 | 3.66E-07 | 21.380           |
| 9   | TetR                         | Oxytetracycline   | 2.06E+03     | 1.99E-03 | 9.65E-07 | 19.983           |
| 10  | TetR                         | Sancycline        | 2.14E+03     | 1.27E-04 | 5.95E-08 | 24.003           |
| 11  | TetR+Mg <sup>2+</sup>        | Tetracycline      | 2.78E+02     | 1.33E-03 | 4.79E-06 | 17.672           |
| 12  | TetR+Mg <sup>2+</sup>        | Chlortetracycline | 4.43E+03     | 1.13E-02 | 2.56E-06 | 18.578           |
| 13  | TetR+Mg <sup>2+</sup>        | Minocycline       | 7.27E+03     | 5.11E-04 | 7.03E-08 | 23.763           |
| 14  | TetR+Mg <sup>2+</sup>        | Tigecycline       | 6.33E+02     | 1.78E-05 | 2.82E-08 | 25.079           |
| 15  | TetR+Mg <sup>2+</sup>        | Doxycycline       | 4.39E+04     | 1.80E-03 | 4.11E-08 | 24.538           |
| 16  | TetR+Mg <sup>2+</sup>        | Demecycline       | 4.61E+03     | 1.27E-04 | 2.76E-08 | 25.110           |
| 17  | TetR+Mg <sup>2+</sup>        | Metacycline       | 1.33E+03     | 1.62E-04 | 1.22E-07 | 22.961           |
| 18  | TetR+Mg <sup>2+</sup>        | Lymecycline       | 4.59E+03     | 1.21E-03 | 2.63E-07 | 21.856           |
| 19  | TetR+Mg <sup>2+</sup>        | Oxytetracycline   | 3.52E+03     | 1.44E-03 | 4.09E-07 | 21.221           |
| 20  | TetR+Mg <sup>2+</sup>        | Sancycline        | 2.31E+03     | 1.62E-04 | 7.02E-08 | 23.764           |
| 21  | TetR mutant                  | Tetracycline      | 2.03E+02     | 1.56E-04 | 7.68E-07 | 20.312           |
| 22  | TetR mutant                  | Chlortetracycline | 5.05E+04     | 8.22E-04 | 1.63E-08 | 25.871           |
| 23  | TetR mutant                  | Minocycline       | 1.36E+04     | 4.23E-05 | 3.10E-09 | 28.265           |
| 24  | TetR mutant                  | Tigecycline       | 9.09E+03     | 9.45E-07 | 1.04E-10 | 33.163           |
| 25  | TetR mutant                  | Doxycycline       | 2.67E+05     | 6.65E-05 | 2.49E-10 | 31.903           |
| 26  | TetR mutant                  | Demecycline       | 5.54E+03     | 1.72E-05 | 3.10E-09 | 28.265           |
| 27  | TetR mutant                  | Metacycline       | 1.44E+03     | 5.71E-06 | 3.97E-09 | 27.908           |
| 28  | TetR mutant                  | Lymecycline       | 2.85E+04     | 7.25E-05 | 2.54E-09 | 28.553           |
| 29  | TetR mutant                  | Oxytetracycline   | 4.53E+04     | 7.96E-05 | 1.76E-09 | 29.082           |
| 30  | TetR mutant                  | Sancycline        | 1.07E+04     | 6.35E-06 | 5.93E-10 | 30.651           |
| 31  | TetR mutant+Mg <sup>2+</sup> | Tetracycline      | 1.95E+03     | 1.21E-04 | 6.21E-08 | 23.941           |
| 32  | TetR mutant+Mg <sup>2+</sup> | Chlortetracycline | 4.43E+04     | 4.04E-04 | 9.11E-09 | 26.710           |
| 33  | TetR mutant+Mg <sup>2+</sup> | Minocycline       | 1.67E+05     | 3.19E-05 | 1.91E-10 | 32.286           |
| 34  | TetR mutant+Mg <sup>2+</sup> | Tigecycline       | 1.71E+04     | 1.78E-06 | 1.04E-10 | 33.163           |
| 35  | TetR mutant+Mg <sup>2+</sup> | Doxycycline       | 1.76E+05     | 1.13E-04 | 6.41E-10 | 30.539           |
| 36  | TetR mutant+Mg <sup>2+</sup> | Demecycline       | 5.07E+04     | 4.70E-06 | 9.28E-11 | 33.327           |
| 37  | TetR mutant+Mg <sup>2+</sup> | Metacycline       | 1.86E+04     | 5.59E-06 | 3.00E-10 | 31.634           |
| 38  | TetR mutant+Mg <sup>2+</sup> | Lymecycline       | 1.01E+05     | 1.10E-04 | 1.09E-09 | 29.773           |
| 39  | TetR mutant+Mg <sup>2+</sup> | Oxytetracycline   | 8.10E+04     | 1.20E-04 | 1.48E-09 | 29.332           |
| 40  | TetR mutant+Mg <sup>2+</sup> | Sancycline        | 1.39E+04     | 5.79E-06 | 4.17E-10 | 31.159           |

Ka, association constant; Kd, dissociation constant; KD = Kd/Ka, equilibrium dissociation constant; KA = Abs (Log2(KD)), absolute affinity constant.

**Figure S1.** The mass spectrometry results of the nine unique peptides (the number sequence was consistent with that of in Table S1).

**No. 1**

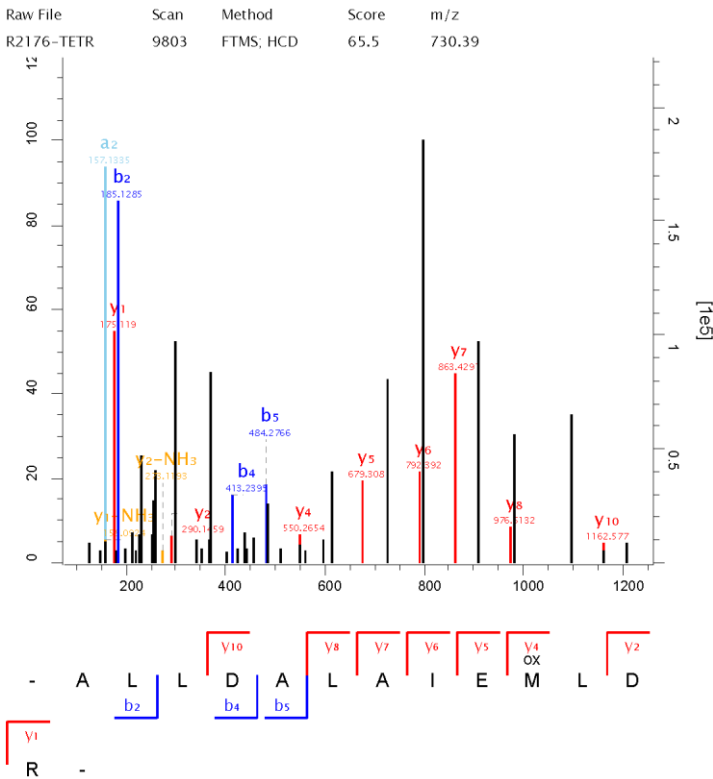

**No. 2**

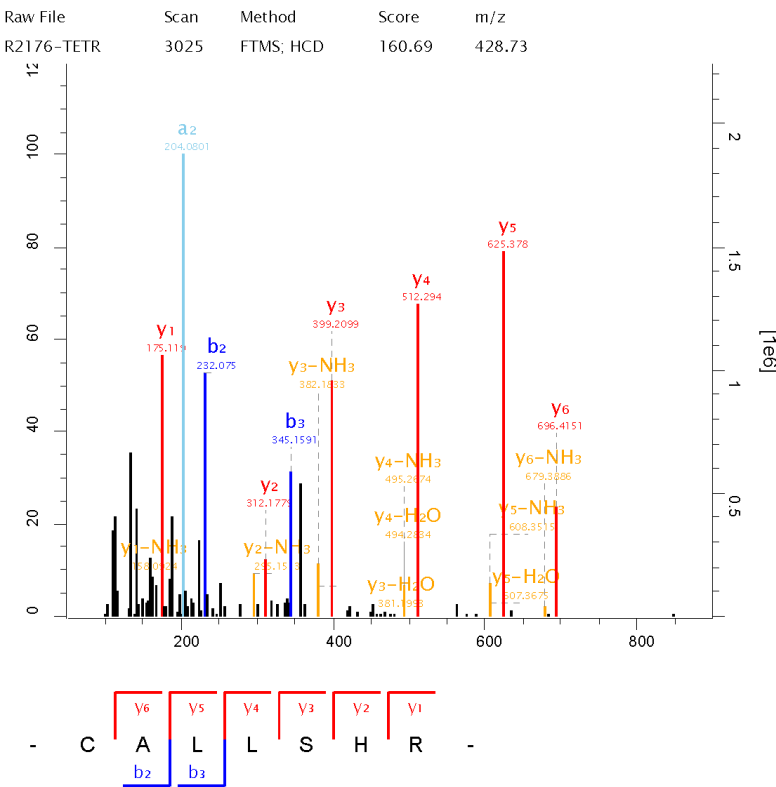

No. 3

Raw File Scan Method Score m/z  
R2176-TETR 2591 FTMS; HCD 82.17 409.88

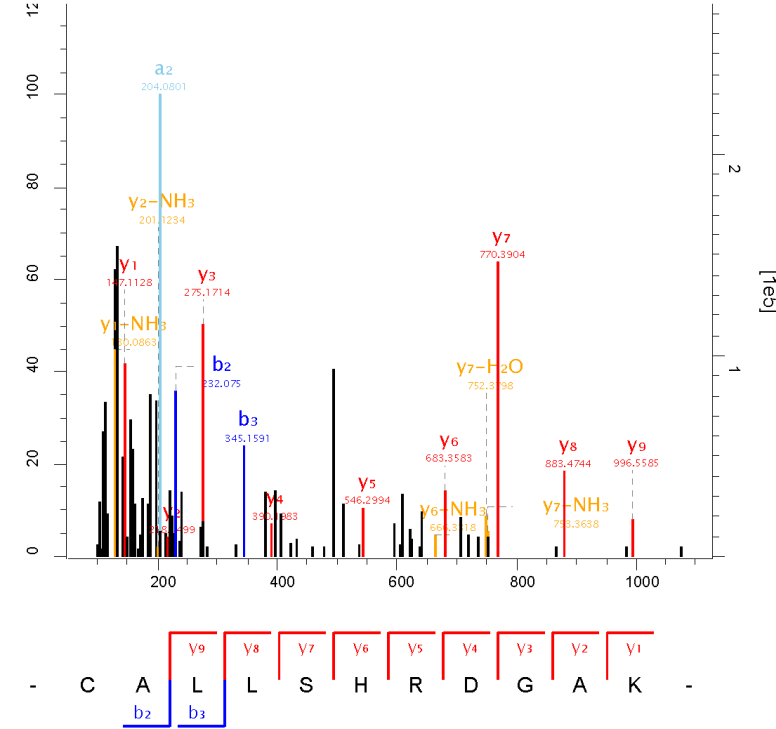

No. 4

Raw File Scan Method Score m/z  
R2176-TETR 5183 FTMS; HCD 60.55 630.31

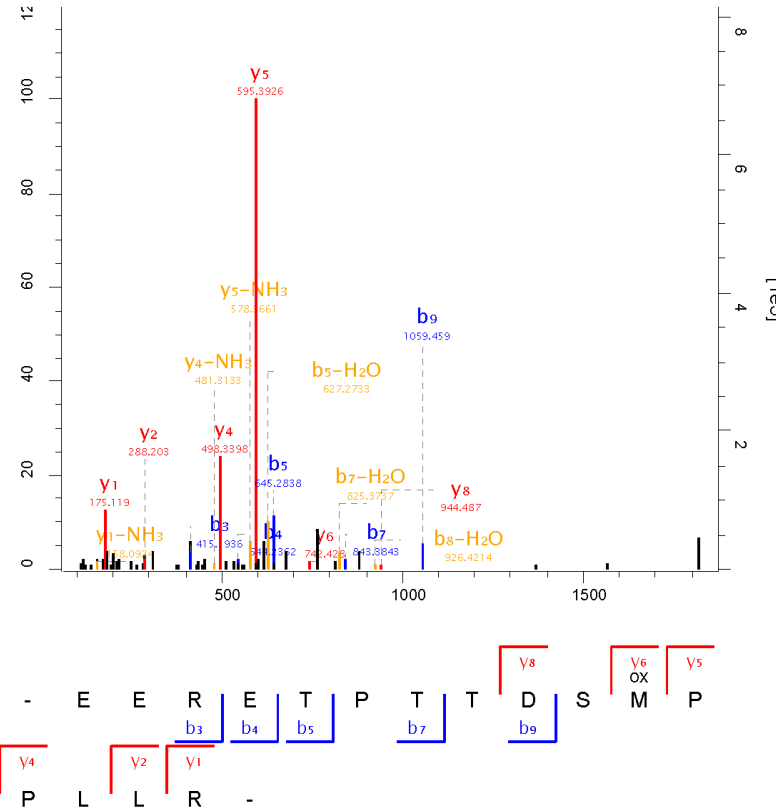

No. 5

Raw File Scan Method Score m/z  
R2176-TETR 5813 FTMS, HCD 114.51 737.37

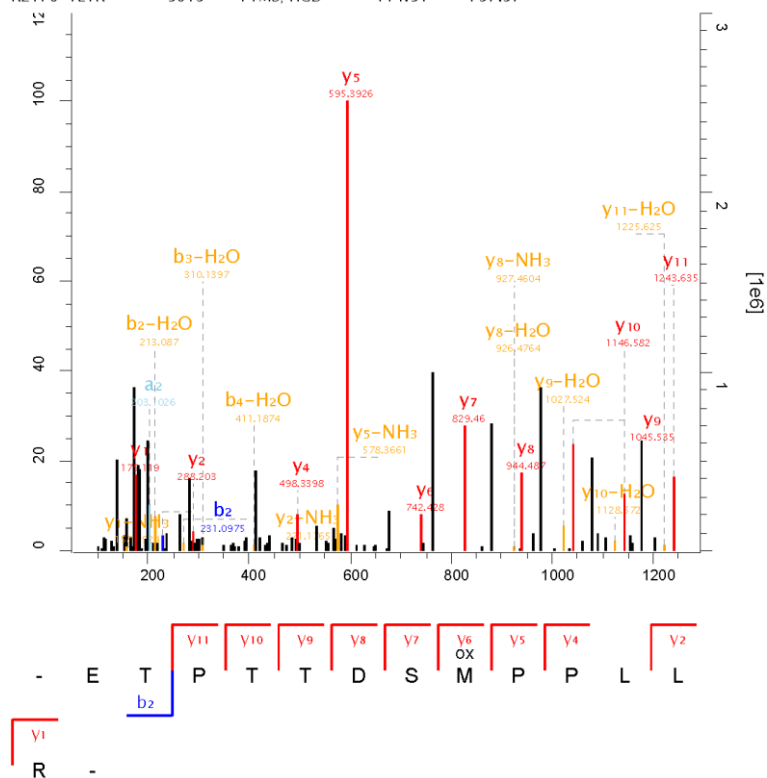

No. 6

Raw File Scan Method Score m/z  
R2176-TETR 7563 FTMS, HCD 52.79 785.42

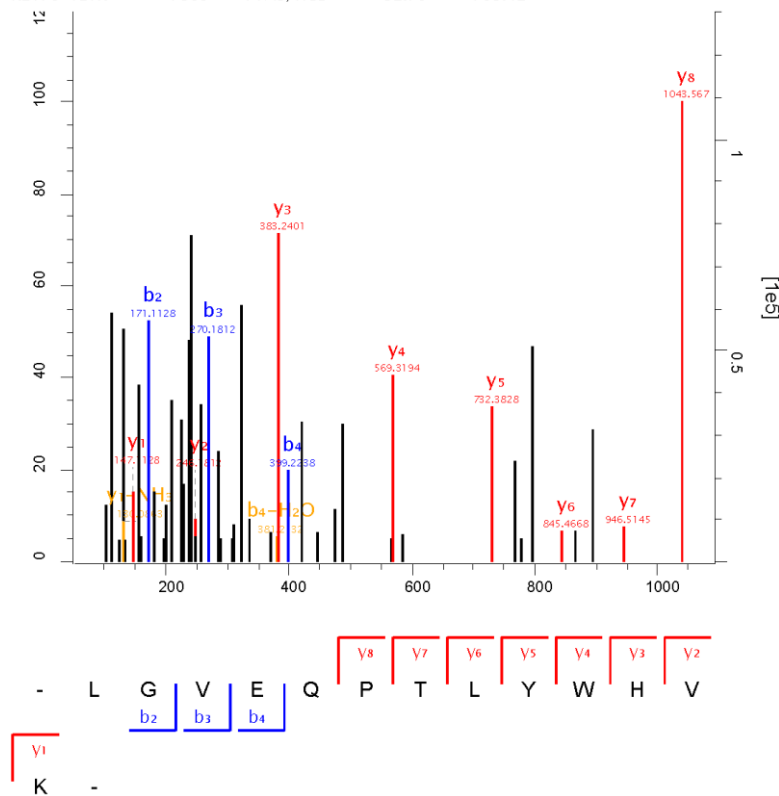

**No. 7**

Raw File Scan Method Score m/z  
R2176-TETR 6035 FTMS; HCD 30.13 656.7

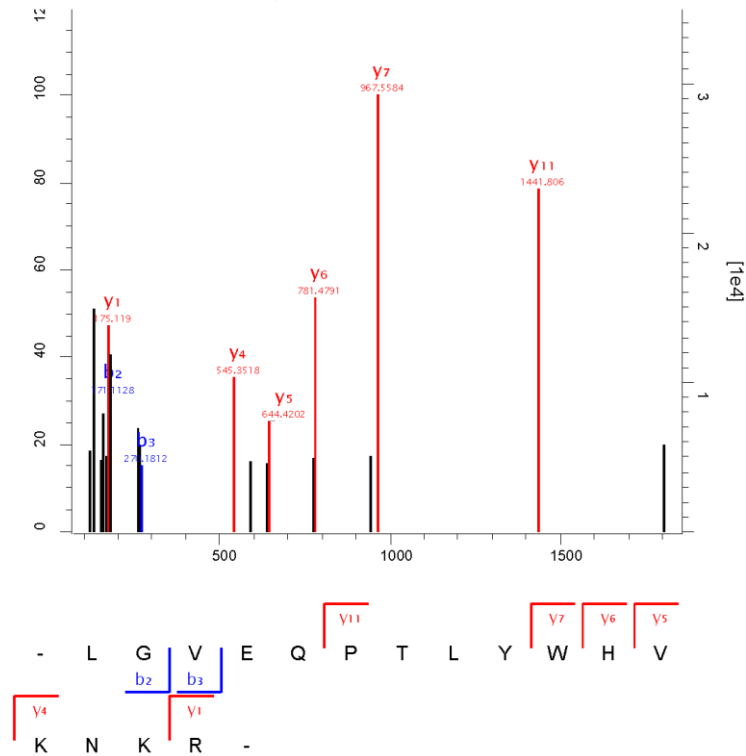

**No. 8**

Raw File Scan Method Score m/z  
R2176-TETR 4911 FTMS; HCD 71.22 416.22

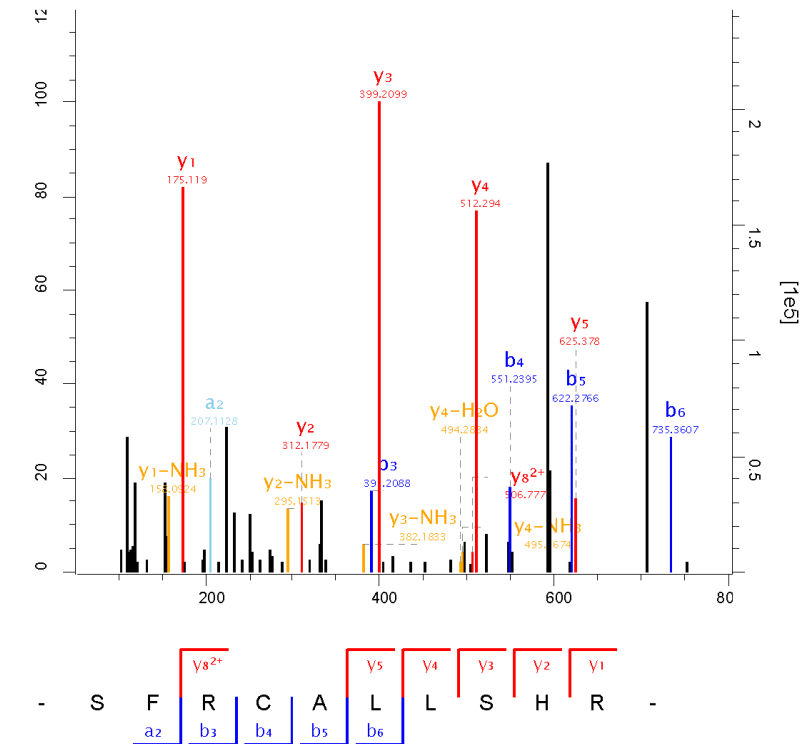

No. 9

| Raw File   | Scan | Method    | Score | m/z    |
|------------|------|-----------|-------|--------|
| R2176-TETR | 6475 | FTMS; HCD | 0     | 539.95 |

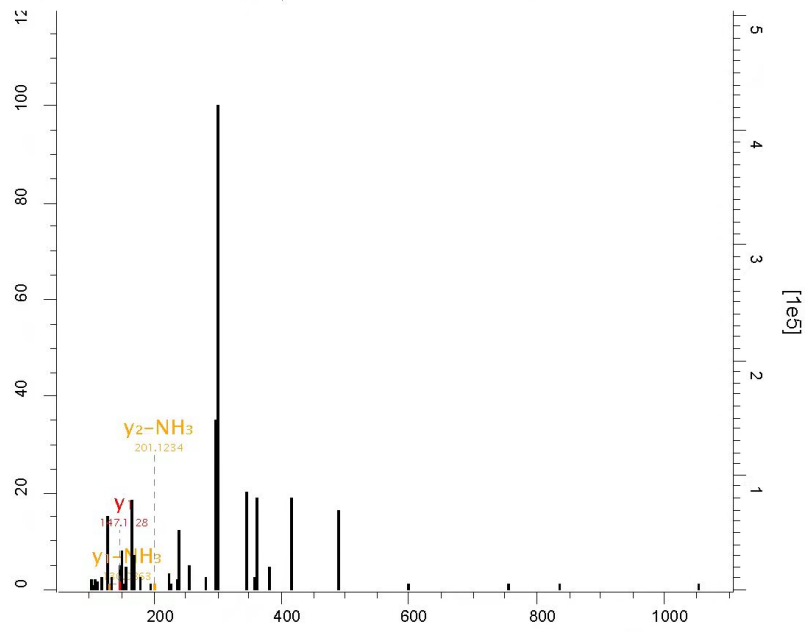

- S F R C A L L S H R D G

A  $y_1$   
K -

**Figure S2.** Amino acid sequences of the natural TetR and the TetR from *Escherichia coli*. (NCBI ID: WP\_000088605.1), *Enterobacter hormaechei* (NCBI ID: WP\_058686930.1), *Morganella morganii* (NCBI ID: WP\_052927103.1), *Salmonella* (NCBI ID: WP\_050959760.1), and *Acinetobacter baumannii* (NCBI ID: WP\_185936927.1). The highlighted amino acids are the 100% conserved residues.

```

our natural TetR.seq      MSRLDKSKVINSALELLNEVGIEGLTTEKLAQKLGVEQTLYWHVKNKRA 50
Escherichia coli.seq     MSRLDKSKVINSALELLNEVGIEGLTTEKLAQKLGVEQTLYWHVKNKRA 50
Enterobacter hormaechei.seq MNKLQREAVIRTALELLNDVMEGLTTERLAERLGVQQFALYWHFKNKRA 50
Morganella morganii.seq  MARLNRESVIDAALELLNETSIDGLTTEKLAQKLGIEQTLYWHVKNKRA 50
Salmonella.seq          MTKLDKGTVIAAALELLNEVGMDSLTTEKLAERLKVQQFALYWHFQNKRA 50
Acinetobacter baumannii.seq -----LLNEVGVDGLTTEKLAERLGVQQFALYWHFRNKRA 35

our natural TetR.seq      LLDALAIEMLDRHHTHFCFLEGESWQDFIRNNAKSFRCALLSHRDGAKVH 100
Escherichia coli.seq     LLDALAIEMLDRHHTHFCFLEGESWQDFIRNNAKSFRCALLSHRDGAKVH 100
Enterobacter hormaechei.seq LLDALAEAMLTINHTHSTERRDDDDWRSFLKGNACSFRRALLAYRDGARIH 100
Morganella morganii.seq  LLDALAVEILARHHDYSLPAAGESWQSFIRNNAMSFRRALLYRDGAKVH 100
Salmonella.seq          LLDALAEAMLAERHTRSLPEENEDWRVFLKENALSFRTALLSYRDGARIH 100
Acinetobacter baumannii.seq LLDALAEAMLAENHTHSVERADDDWRSFLIGNARSFRRQALLAYRDGARIH 85

our natural TetR.seq      LGTRFTEKQYETLENLAFLCQQSFSLLENALYALSAVGHFTLGCVLEDQE 150
Escherichia coli.seq     LGTRFTEKQYETLENLAFLCQQSFSLLENALYALSAVGHFTLGCVLEDQE 150
Enterobacter hormaechei.seq AGTRFAAPQMEKADALRLCDAGFSAGDATYALMAISYFTVGAIVLEQQA 150
Morganella morganii.seq  LGTRFDEKQYDTVETQLRFMTDNGFSLRDGLYALSAVSHFTLGAIVLEQQA 150
Salmonella.seq          AGTRFTEPIFCSAETQLRFLCAEGFCPKRAVWALRAVSHYVVGSVLEQQA 150
Acinetobacter baumannii.seq ASTRFGAPQMETADEQLRFLCEAGFSAGDAVNALMTISYFTVGAIVLEQQA 135

our natural TetR.seq      HQVAKEERE----TPTTDSMPPLLRQAIELFDHQGAEPALFGLLELIICG 196
Escherichia coli.seq     HQVAKEERE----TPTTDSMPPLLRQAIELFDHQGAEPALFGLLELIICG 196
Enterobacter hormaechei.seq SEADAEEERGEDQLTTSASTMPARLQSAMKIVYEGGPDAAFERGLALIIGG 200
Morganella morganii.seq  HSAALADSS----ATPDENLPPLIREALHIMSDDGEQAFHGLLESILIG 196
Salmonella.seq          S--DADERVPDRPDVSEQAPSSFLHDLFHELETGMDAAFNFGLDSLIAG 198
Acinetobacter baumannii.seq GDSDAGEEGG---TVEQAPLSPLRAAIDAFDEAGPDAAFEQ 174

our natural TetR.seq      LEKQLKCESGS 207
Escherichia coli.seq     LEKQLKCESGS 207
Enterobacter hormaechei.seq LEKMRLTTNDIEVLKNVDE 219
Morganella morganii.seq  FEVQLTHSGQSPQ 209
Salmonella.seq          FERLRSSTTD 208
Acinetobacter baumannii.seq 174

```



**Figure S3.** Docking complexes of the natural TetR (A-I) and the mutant (A'-I') with other 9 TCs.

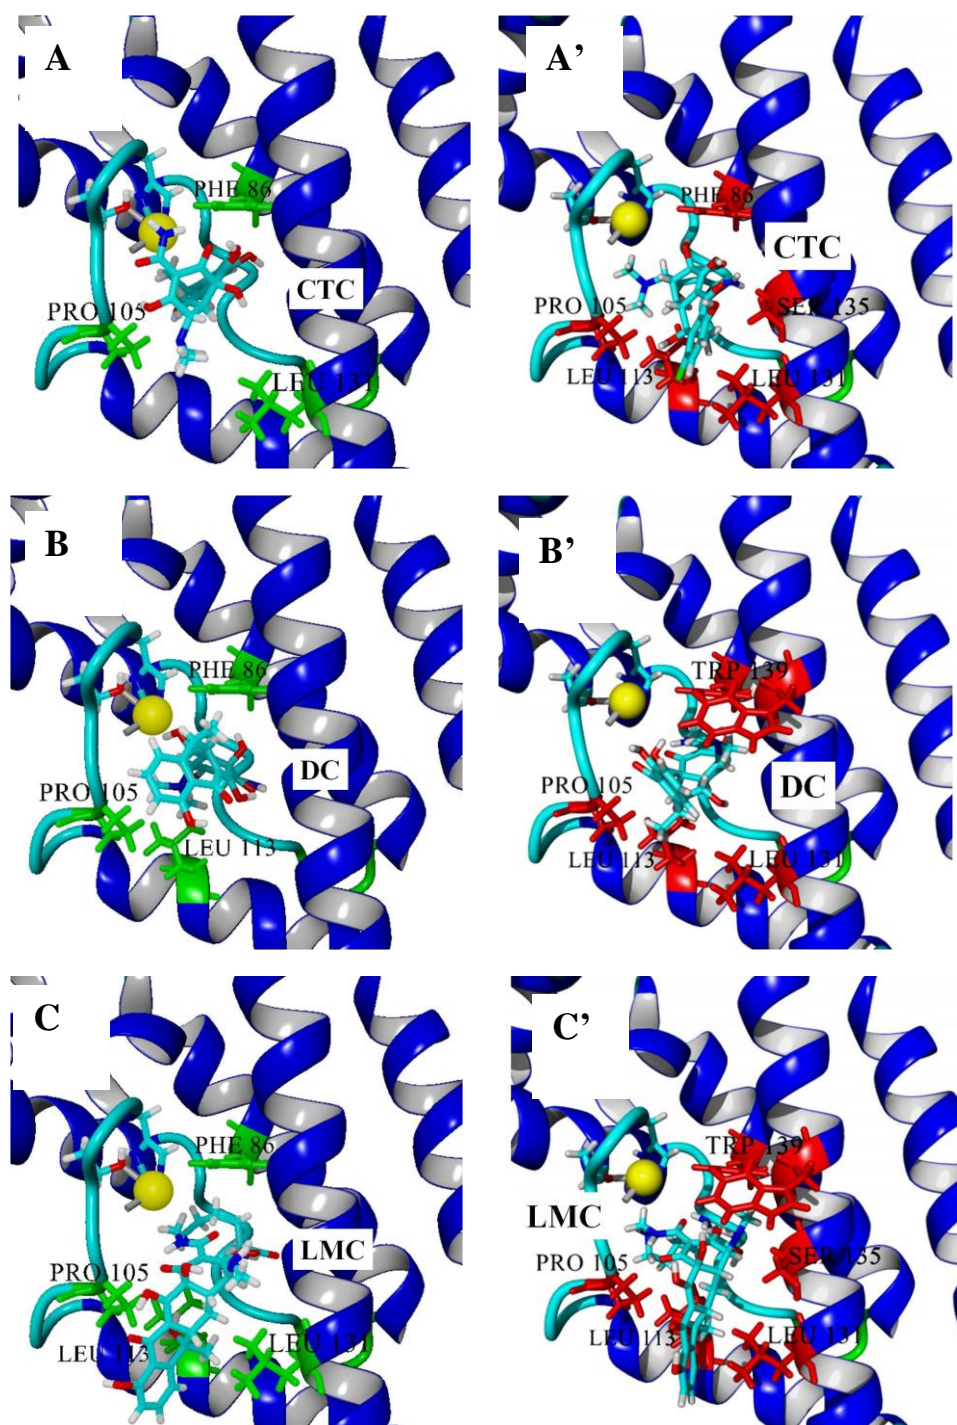

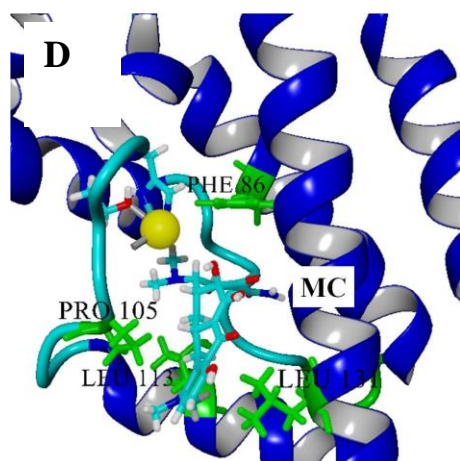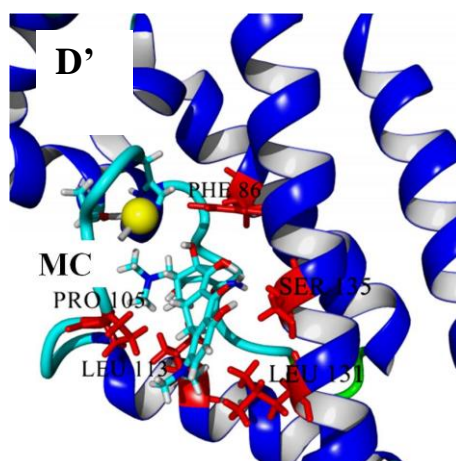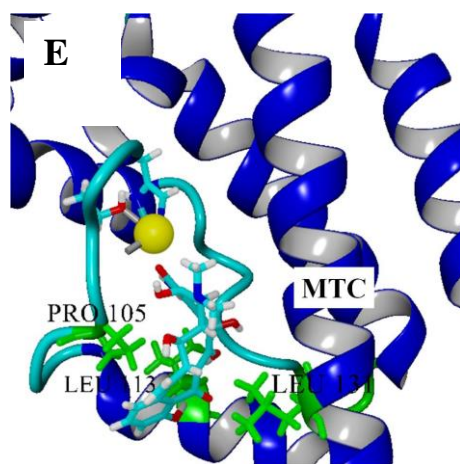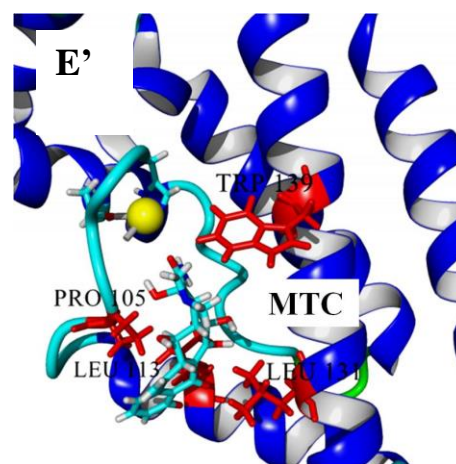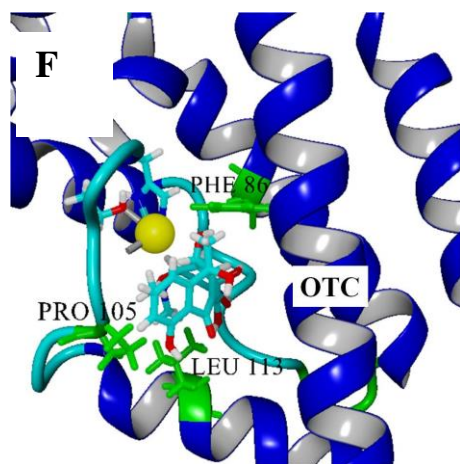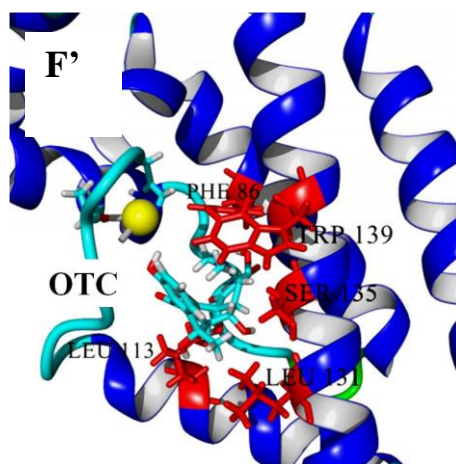



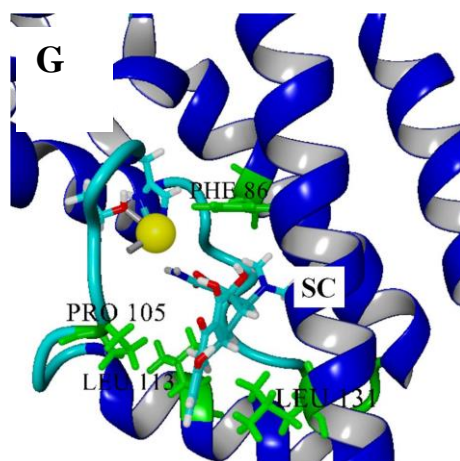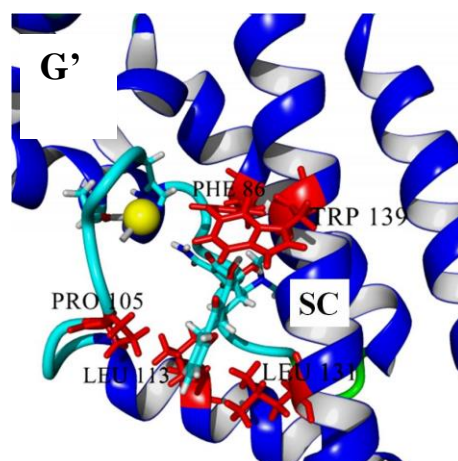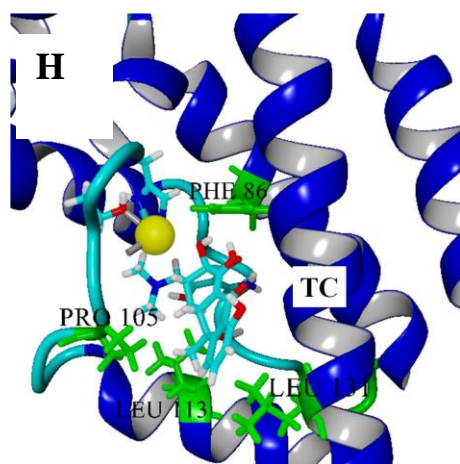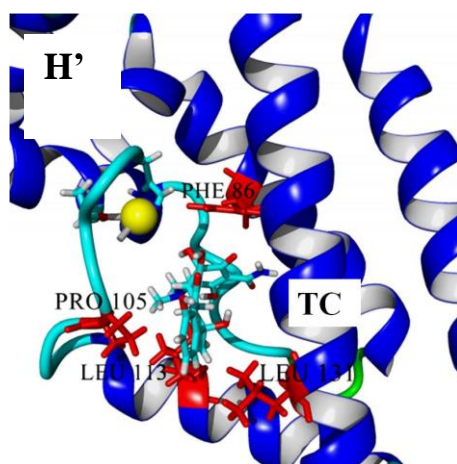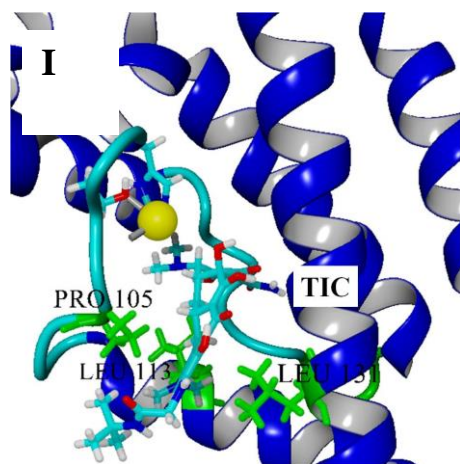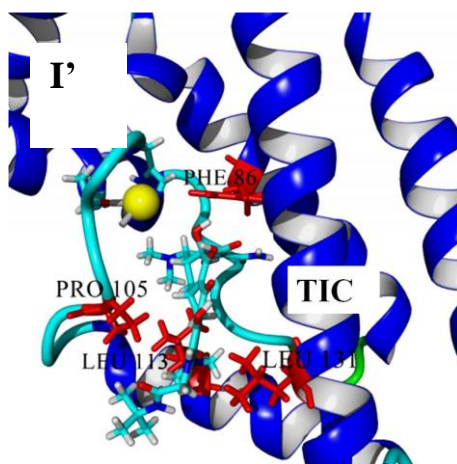

**Figure S4.** Results for optimization of (A) FA-MC/mutant concentrations ( $\text{MgCl}_2$  5 mM, incubation 5 min), (B)  $\text{MgCl}_2$  concentration (FA-MC 1:500, mutant 1:2000, incubation 5 min), and (C) incubation time (FA-MC 1:500, mutant 1:2000,  $\text{MgCl}_2$  8 mM) by using 100 ng/mL of DMC (n=5).

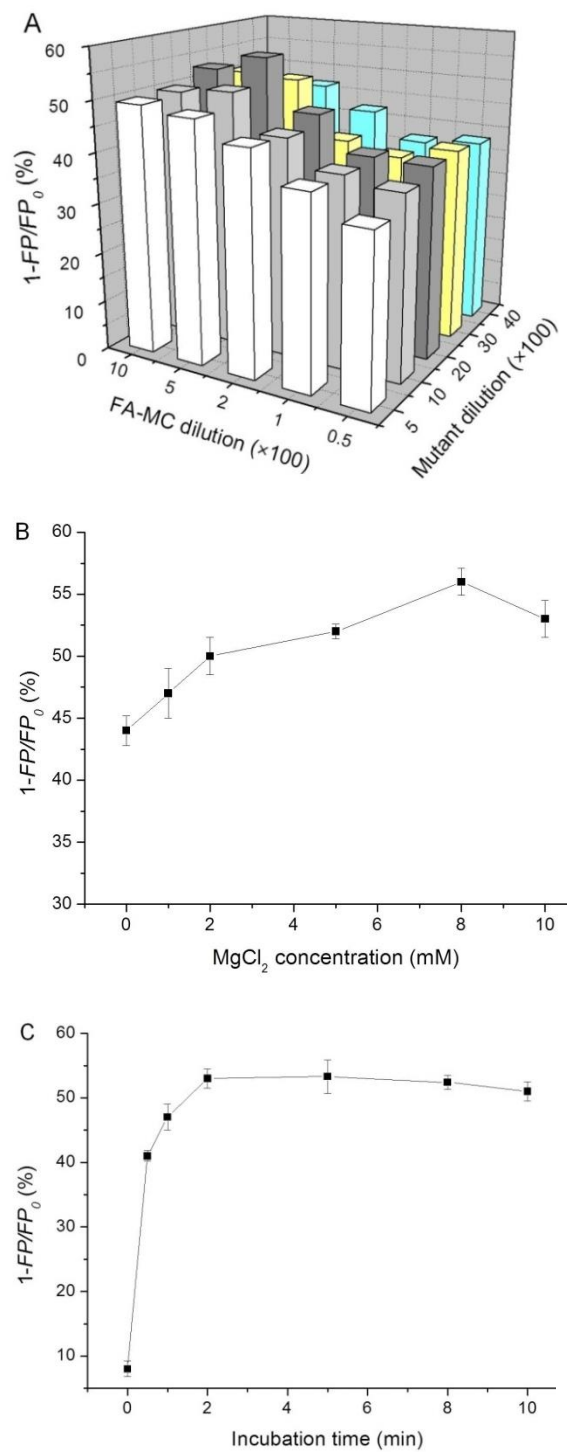

Supplement: s1 [file s1]
